# Supplementary material
Source: Springer Nature journal article supplement (https://www.springermedizin.de/resource/supplementary/12865_2009_290_MOESM1_ESM.pdf/9427798)

**A i)****LsA IgG1**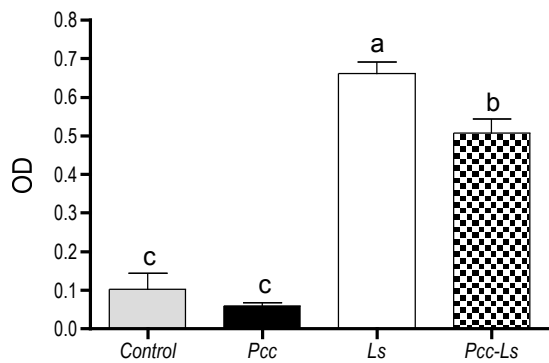**ii)****LsA IgG2a**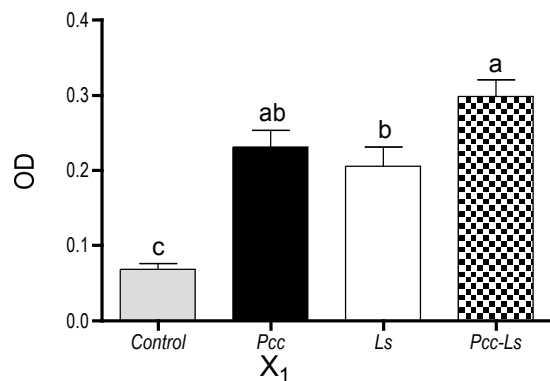**B i)****pRBC IgG1**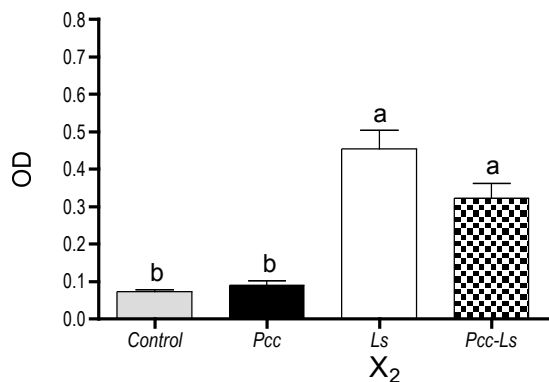**ii)****pRBC IgG2a**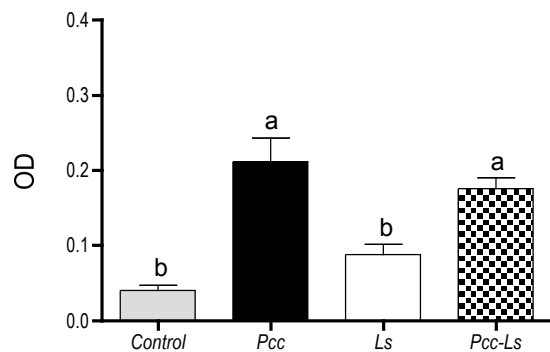**C****Total IgE**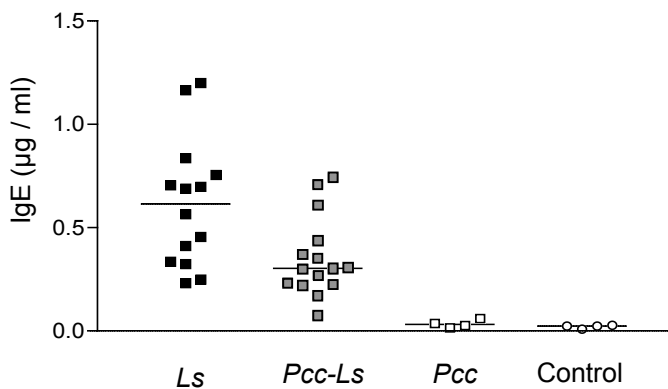

Supplement: MOESM1 [file 9427798]
